# Supplementary material
Source: publisher figshare collection journal article supplement (https://frontiersin.figshare.com/ndownloader/files/21726837)
Supplement: Supplementary file [file 21726837]

# Supplementary Material

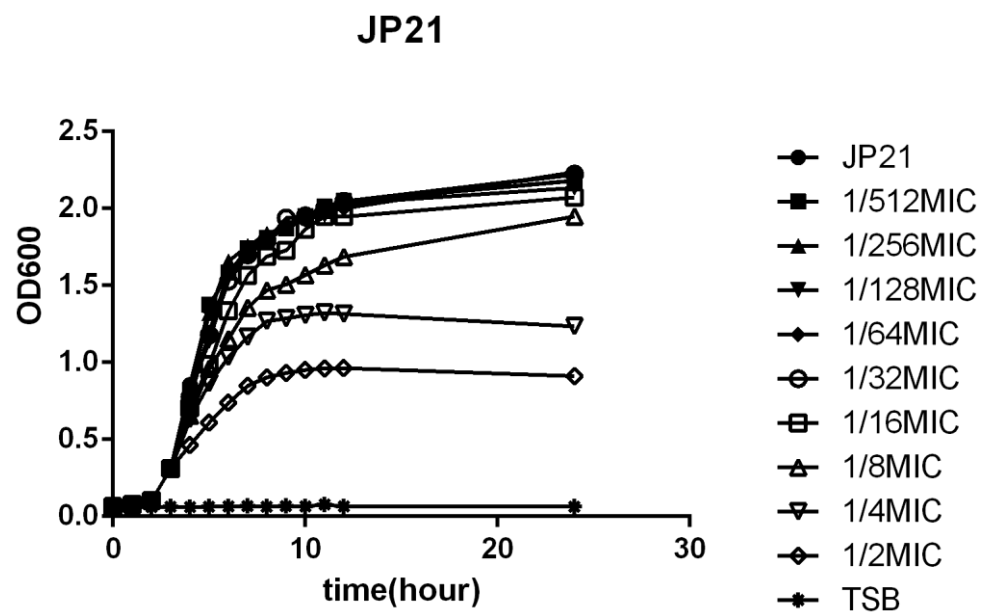

**Figure S1.** Growth curve of *S. aureus* JP21 at different sub-inhibitory concentrations of fusidic acid.

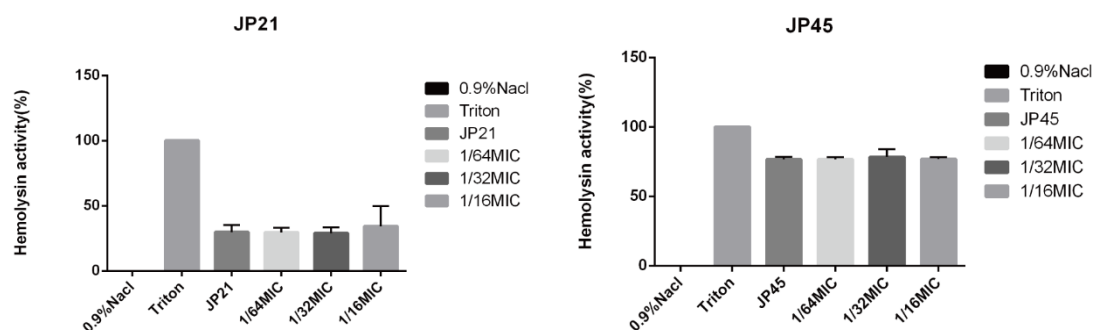

**Figure S2.** The same amount of solvent (95% ethanol) as the corresponding concentration of fusidic acid had no effect on the hemolytic activity of *S. aureus*. 0.9% NaCl and Triton used as negative control and positive control, respectively. Each test was performed independently in triplicate.

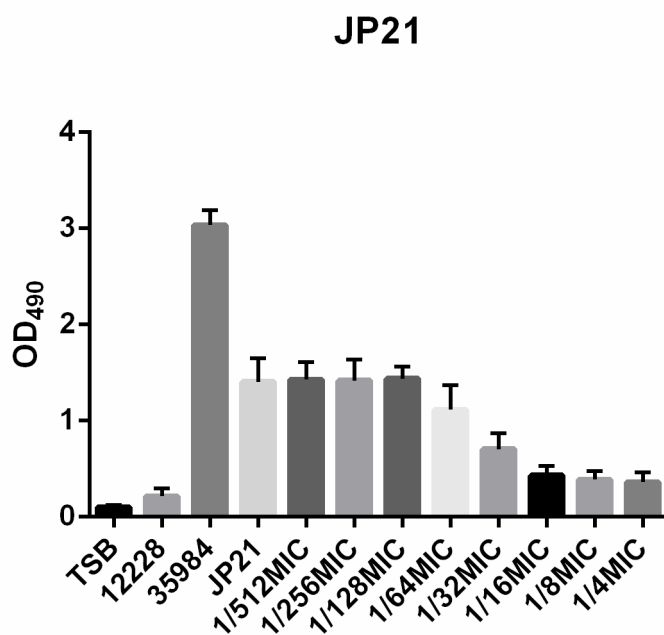

**Figure S3.** The effect of different sub-inhibitory concentrations of fusidic acid on the formation of JP21 biofilm.

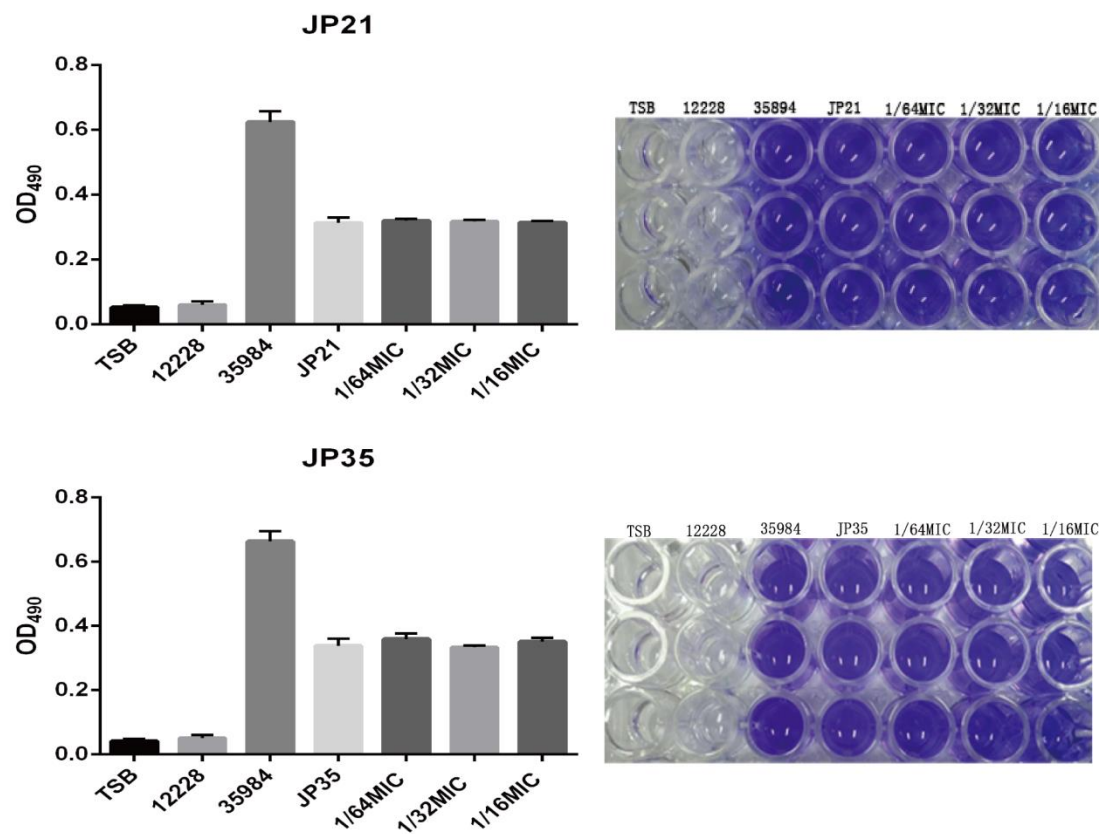

**Figure S4.** The same amount of solvent (95% ethanol) as the corresponding concentration of fusidic acid had no effect on the formation of *S. aureus* biofilm. On the right is the picture after dissolution with glacial acetic acid, and on the left is the OD value measured at 490 nm. *Staphylococcus sp.* 12228, 35884 as negative control and positive control, respectively. There was no difference in the control group (growth without fusidic acid) for each strain. Each test was performed independently in triplicate.

**Table S1 Primers used for real-time RT-PCR**

| <b>Primer name</b> | <b>Sequence (5 mers u</b> |
|--------------------|---------------------------|
| <i>gyrB</i> -RT-F  | ACATTACAGCAGCGTATTAG      |
| <i>gyrB</i> -RT-R  | CTCATAGTGATAGGAGTCTTCT    |
| <i>icaA</i> -RT-F  | GTTGGTATCCGACAGTATA       |
| <i>icaA</i> -RT-R  | CACCTTTCTTACGTTTAAATG     |
| <i>cidA</i> -RT-F  | TAGCGTAATTTTCGGAAGC       |
| <i>cidA</i> -RT-R  | GGCAGTATTGTTGGTCTA        |
| <i>sarA</i> -RT-F  | AAACCCTGAATTTGAATG        |
| <i>sarA</i> -RT-R  | GATATTACATCTGCTCCT        |
| <i>spa</i> -RT-F   | AGGCTTGTTGTTGTCTTC        |
| <i>spa</i> -RT-R   | CCTTCAGTGAGCAAAGAA        |
| <i>hla</i> -RT-F   | GTCATTTCTTCTTTTTCCCAATCG  |
| <i>hla</i> -RT-R   | CACGTATAGTCAGCTCAGTAACA   |
| <i>saeR</i> -RT-F  | GTCGTAACCATTAACCTTCTG     |
| <i>saeR</i> -RT-R  | ATCGTGGATGATGAACAA        |
| <i>saeS</i> -RT-F  | TGTATTTAAAGTGATAATATGAG   |
| <i>saeS</i> -RT-R  | CTTAGCCCATGATTTAAAACA     |
